# Supplementary material
Source: publisher figshare collection journal article supplement (https://sage.figshare.com/ndownloader/files/12467840)
Supplement: Supplementary file 1 [file 12467840]

*Supplemental Table 1*

Mean difference in pre-operative wrist range of motion in tenodesis and capsulodesis. Both groups were subdivided based on whether the surgical technique described crossed the radiocarpal joint, or did not cross the radiocarpal joint. There was no statistically significant difference between tenodesis techniques that cross the radiocarpal joint and those that do not, capsulodesis techniques that cross the radiocarpal joint and those that do not, or between overall tenodesis and capsulodesis groups. RCJ= radiocarpal joint. X= data not reported. Statistical significance defined by p-value <0.05.

|  | Tenodesis | | | Capsulodesis | | |
| --- | --- | --- | --- | --- | --- | --- |
| Crosses RCJ | Does not cross RCJ | Overall | Crosses RCJ | Does not cross RCJ | Overall |
| Degree of wrist extension (% change) | -15.5 (-27.4%) | -6.9 (-11.4%) | -5.6 (-9.3%) | -2.5 (-4.5%) | -10.3 (-17.1%) | -6.4 (-11.2%) |
| Degree of wrist flexion (% change) | -20 (-36%) | -7.2 (-13.1%) | -5.8 (-10.7%) | -9.6 (-16.9%) | -9.6 (-15.7%) | -10 (-17%) |
| Degree of ulnar deviation (% change) | -4 (-16%) | -1.5 (-5%) | -0.9 (-2.9%) | 2.2 (7.9%) | -5 (-12.4%) | -1.9 (-5.8%) |
| Degree of radial deviation (% change) | -4 (-22%) | -1.4 (-6.7%) | -0.8 (-10.4%) | 1.7 (13%) | -2.8 (-12.4%) | -0.8 (-4.5%) |
